# Supplementary material
Source: Springer Nature journal article supplement (https://www.springermedizin.de/resource/supplementary/12889_2011_3792_MOESM1_ESM.pdf/9489864)

**Estimated Effect of Watching Television on Body Mass Index (BMI) by Classification**

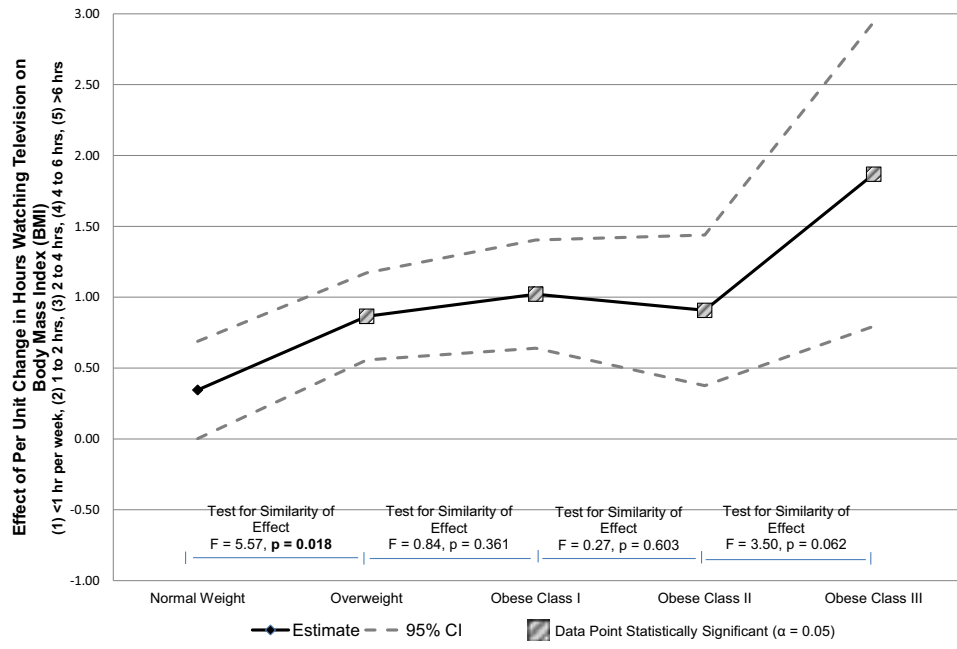

**Estimated Effect of Moderate Exercise on Body Mass Index (BMI) by Classification**

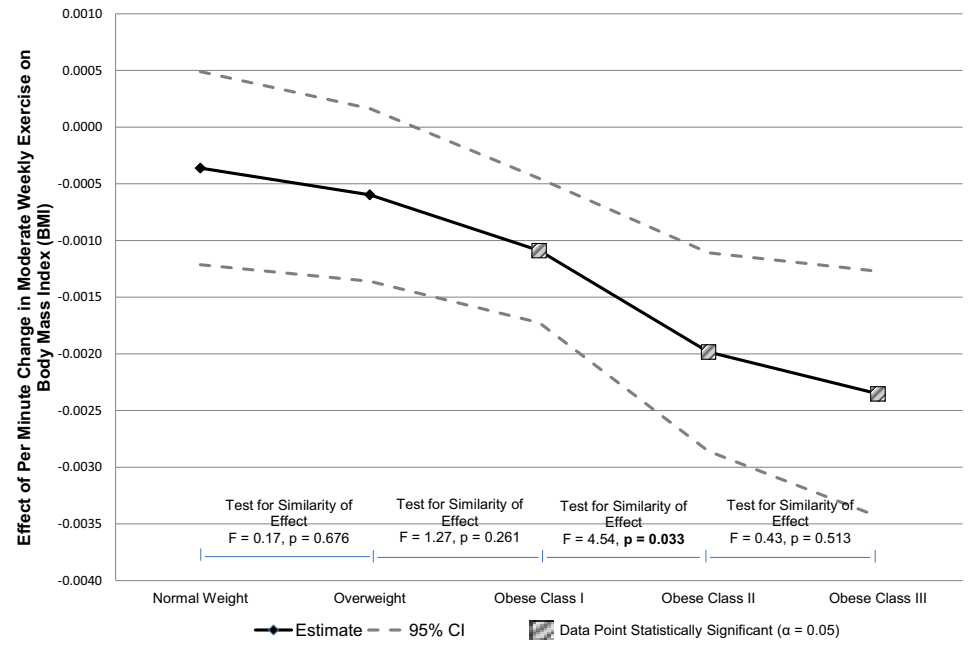

**Estimated Effect of Self-Reporting as African-American on Body Mass Index (BMI) by Classification**

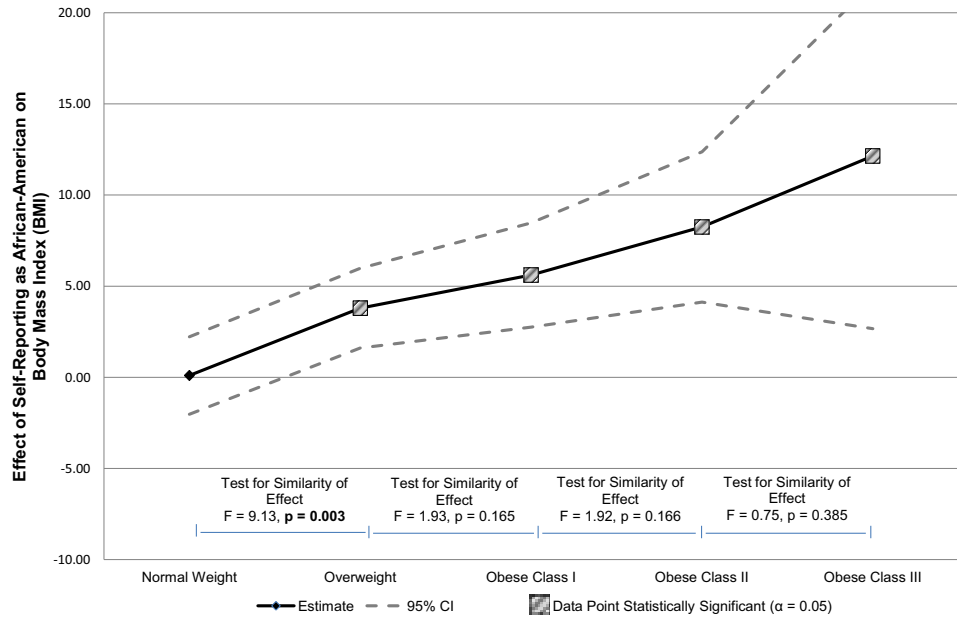

**Estimated Effect of Self-Reporting as Hispanic on Body Mass Index (BMI) by Classification**

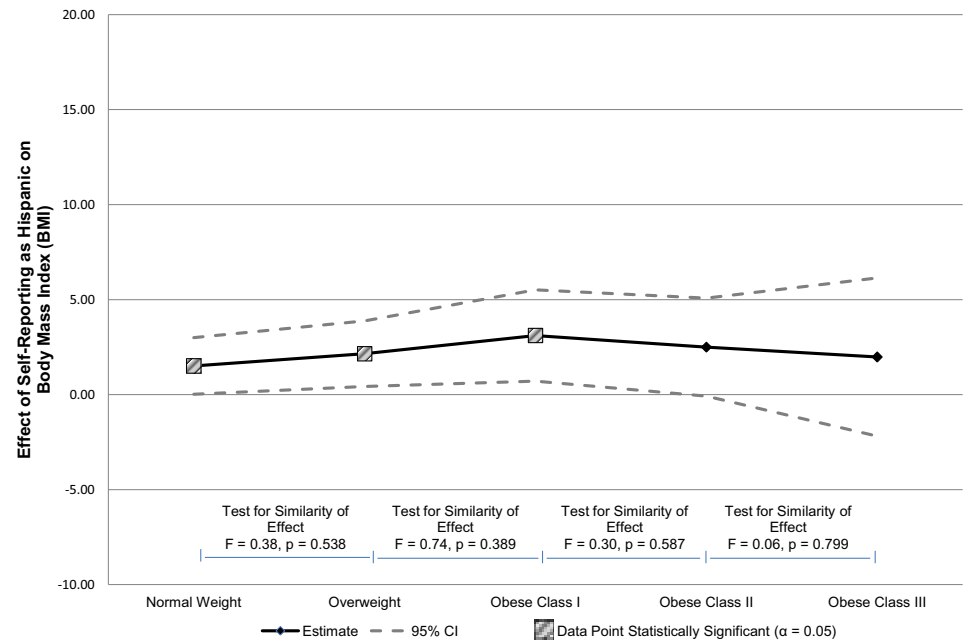

Supplement: MOESM1 [file 9489864]
